# Supplementary material for: Analysis of the transcriptomic features of microsatellite instability subtype colon cancer
Source: PubMed Central journal article supplement (PMC6585086; doi:10.1186/s12885-019-5802-2), 2019-06-20

Figure.S1

a

| Datasets | MSI  | MSS   | Platform                                           | PubMed_ID     |
|----------|------|-------|----------------------------------------------------|---------------|
| GSE13067 | N=11 | N=63  | GPL570 Affymetrix Human Genome U133 Plus 2.0 Array | PMID:19088021 |
| GSE13294 | N=78 | N=77  | GPL570 Affymetrix Human Genome U133 Plus 2.0 Array | PMID:19088021 |
| GSE18088 | N=19 | N=34  | GPL570 Affymetrix Human Genome U133 Plus 2.0 Array | PMID:21465190 |
| GSE24551 | N=21 | N=110 | GPL5175 Affymetrix Human Exon 1.0 ST Array         | PMID:21619627 |
| GSE26682 | N=18 | N=119 | GPL96 Affymetrix Human Genome U133A Array          | PMID:21300766 |
| GSE39084 | N=16 | N=54  | GPL570 Affymetrix Human Genome U133 Plus 2.0 Array | PMID:25083765 |
| GSE41258 | N=44 | N=166 | GPL96 Affymetrix Human Genome U133A Array          | PMID:19359472 |

b

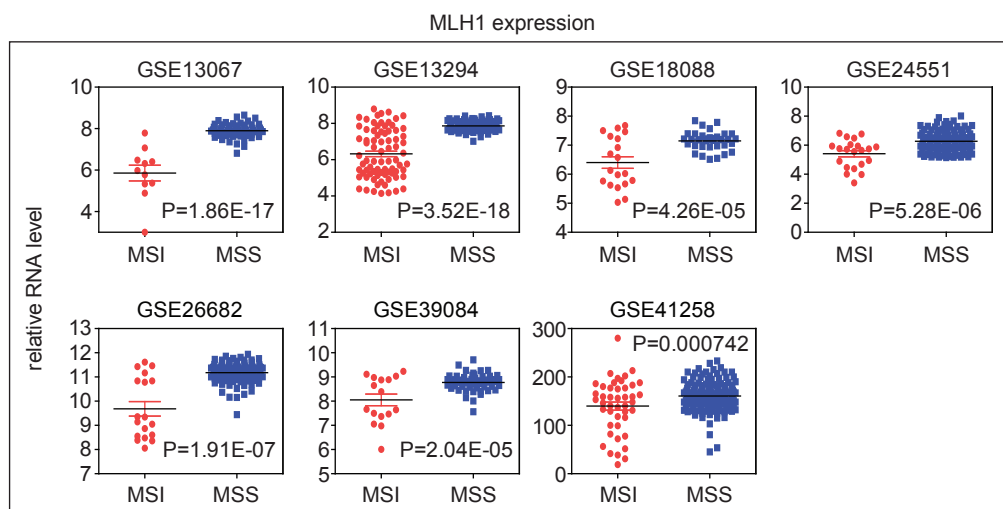

c

| Datasets | Patient number | Platform                                           |
|----------|----------------|----------------------------------------------------|
| GSE14333 | N=290          | GPL570 Affymetrix Human Genome U133 Plus 2.0 Array |
| GSE17536 | N=232          | GPL570 Affymetrix Human Genome U133 Plus 2.0 Array |
| GSE33113 | N=90           | GPL570 Affymetrix Human Genome U133 Plus 2.0 Array |
| GSE39582 | N=566          | GPL570 Affymetrix Human Genome U133 Plus 2.0 Array |
| GSE24551 | N=160          | GPL5175 Affymetrix Human Exon 1.0 ST Array         |

Figure.S2

a

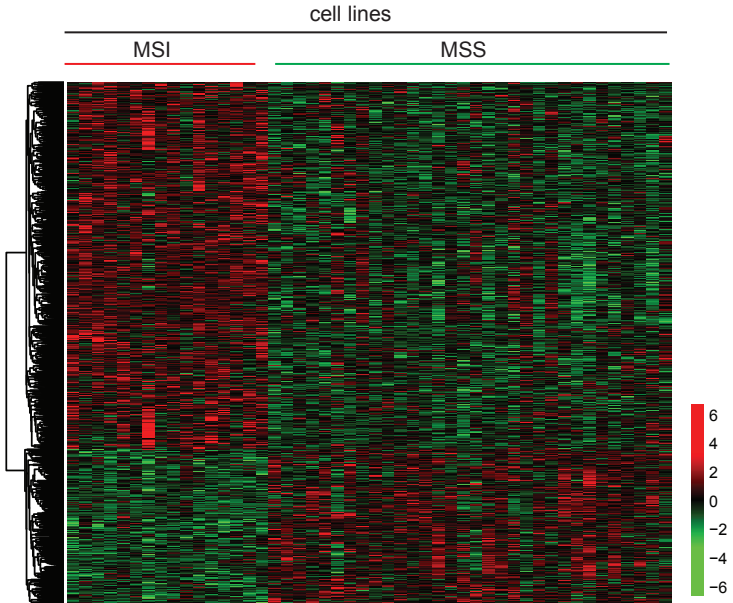

b

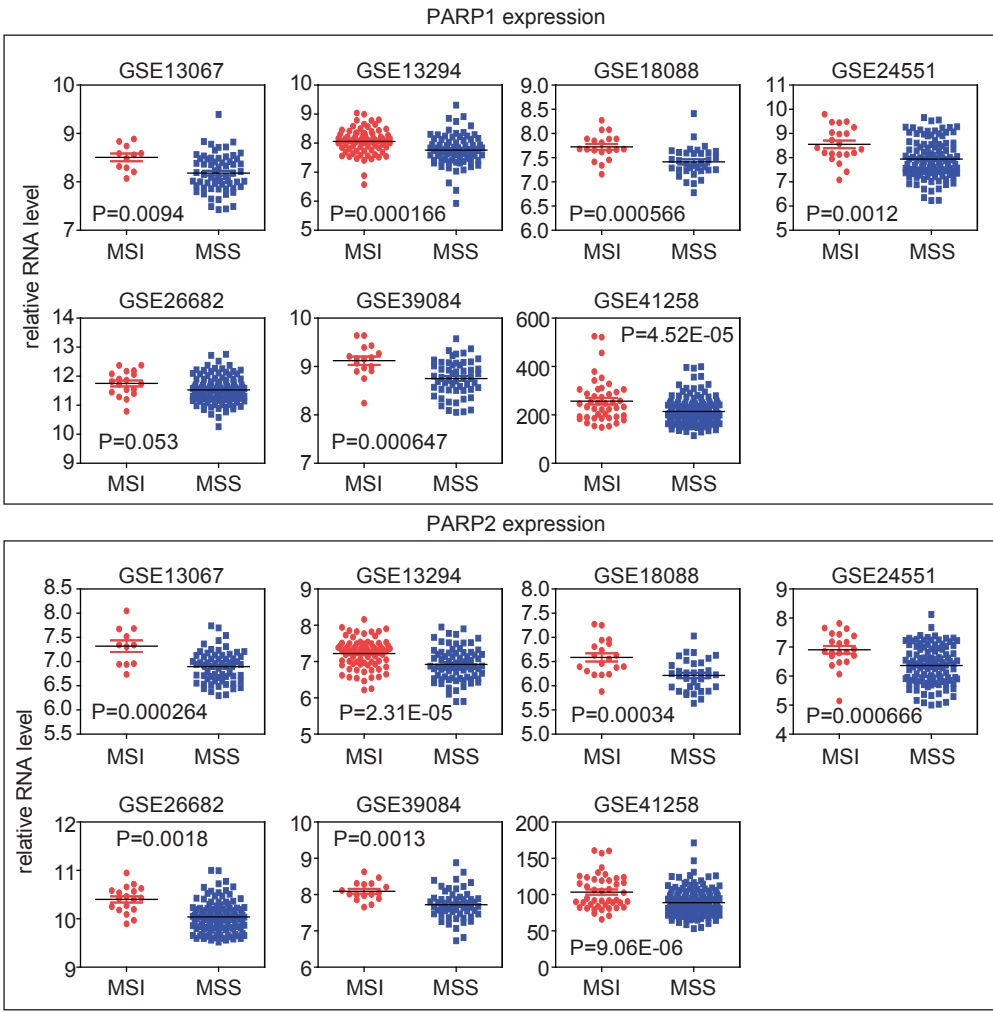

Figure.S3

a

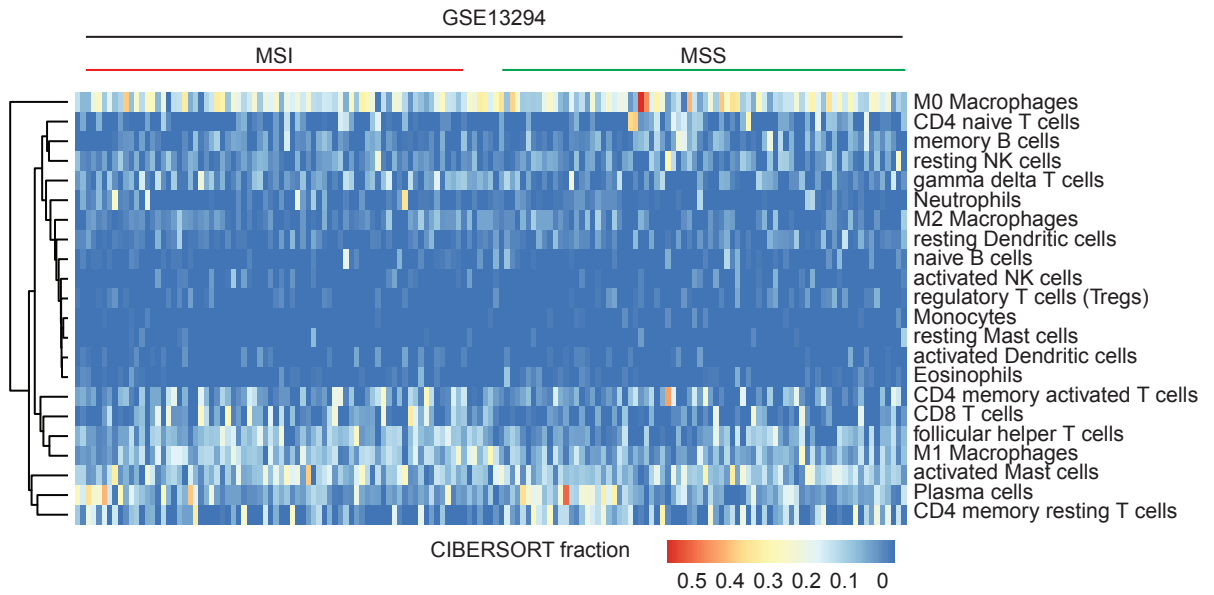

b

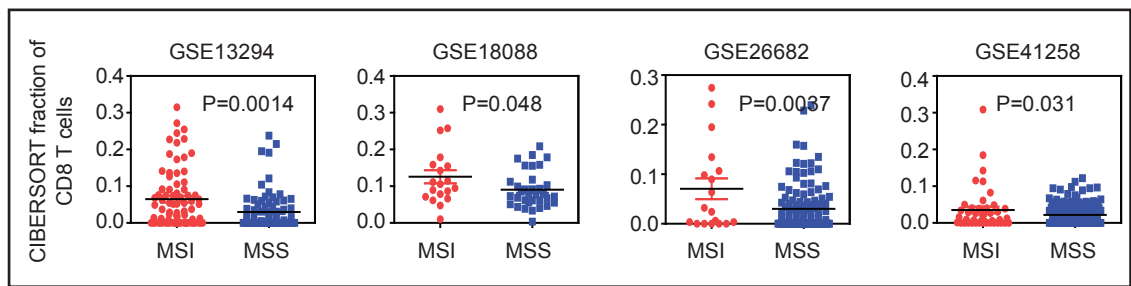

c

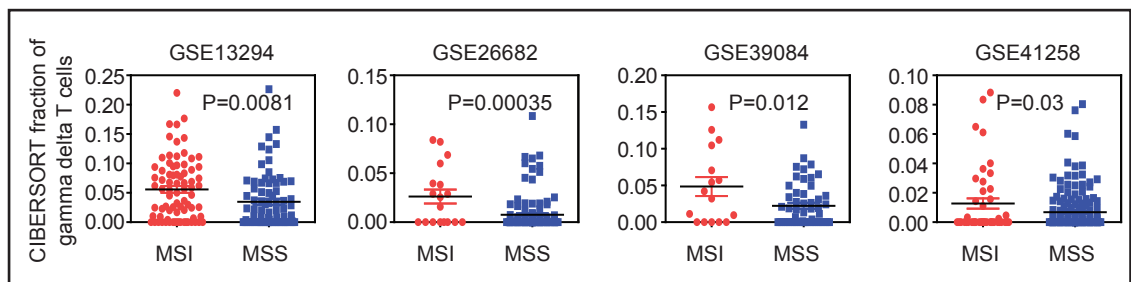

Supplement: 12885_2019_5802_MOESM1_ESM.pdf [file 12885_2019_5802_MOESM1_ESM.pdf]
